# Supplementary material for: Isolation of acute myeloid leukemia blasts from blood using a microfluidic device
Source: Royal Society of Chemistry journal article supplement (doi:10.1039/d4an00158c), 2024-01-01

### Functionalisation A

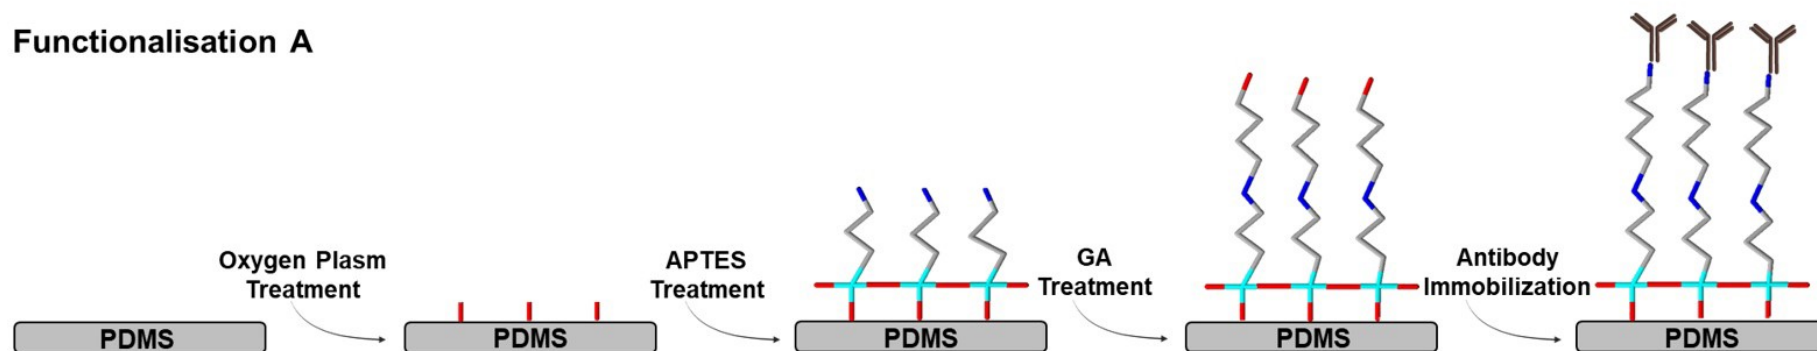

### Functionalisation B

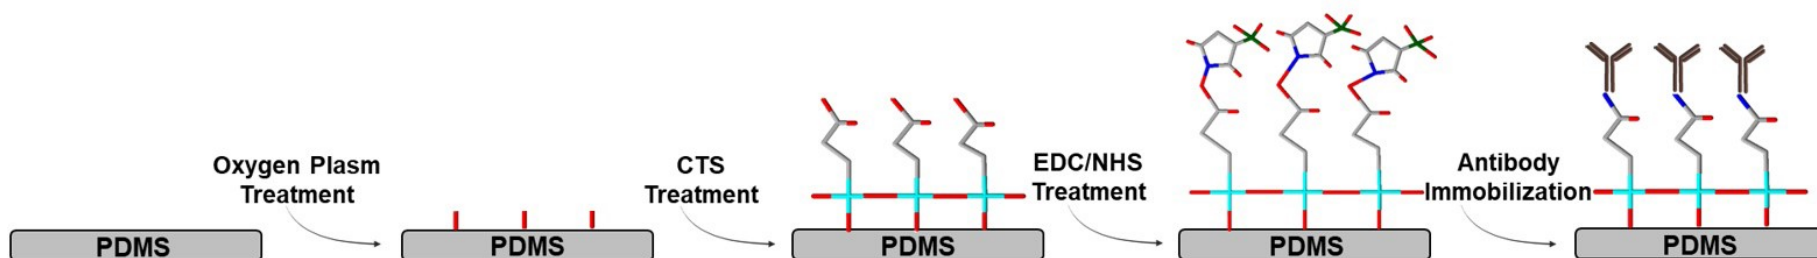

● OH   ● Si   ● CH<sub>3</sub>   ● NH   ● S

(3-aminopropyl) triethoxysilane (APTES)

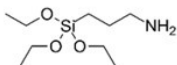

Glutaraldehyde (GA)

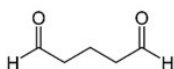

Carboxyethylsilanetriol (CTS)

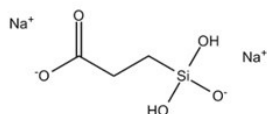

N-(3-dimethylaminopropyl)-N'-ethylcarbodiimide (EDC)

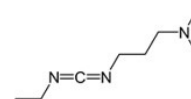

N-hydroxysuccinimide (NHS)

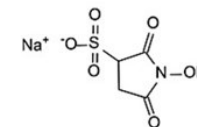

Supplement: d4an00158c9.pdf [file d4an00158c9.pdf]
