# Supplementary material for: Isolation of acute myeloid leukemia blasts from blood using a microfluidic device
Source: Royal Society of Chemistry journal article supplement (doi:10.1039/d4an00158c), 2024-01-01
Supplement: d4an00158c11.pdf [file d4an00158c11.pdf]

|                                                            |                             |        |         |        |         |        |         |
|------------------------------------------------------------|-----------------------------|--------|---------|--------|---------|--------|---------|
| # particles stuck in unit cell                             |                             | 3L     | 3L + HB | 4L     | 4L + HB | FL     | FL + HB |
|                                                            | 2 $\mu\text{L}/\text{min}$  | 66     | 71      | 71     | 61      | 108    | 93      |
|                                                            | 20 $\mu\text{L}/\text{min}$ | 60     | 68      | 69     | 61      | 113    | 90      |
|                                                            | 40 $\mu\text{L}/\text{min}$ | 62     | 70      | 68     | 60      | 110    | 100     |
|                                                            |                             |        |         |        |         |        |         |
| % particles stuck in unit cell                             | 300                         | 3L     | 3L + HB | 4L     | 4L + HB | FL     | FL + HB |
|                                                            | 2 $\mu\text{L}/\text{min}$  | 22.00% | 23.67%  | 23.67% | 20.33%  | 36.00% | 31.00%  |
|                                                            | 20 $\mu\text{L}/\text{min}$ | 20.00% | 22.67%  | 23.00% | 20.33%  | 37.67% | 30.00%  |
|                                                            | 40 $\mu\text{L}/\text{min}$ | 20.67% | 23.33%  | 22.67% | 20.00%  | 36.67% | 33.33%  |
|                                                            |                             |        |         |        |         |        |         |
| % particles stuck in whole chip,<br>according # unit cells | 300                         | 3L     | 3L + HB | 4L     | 4L + HB | FL     | FL + HB |
|                                                            | 2 $\mu\text{L}/\text{min}$  | 93.50% | 94.87%  | 97.72% | 95.85%  | 98.20% | 96.45%  |
|                                                            | 20 $\mu\text{L}/\text{min}$ | 91.41% | 94.08%  | 97.42% | 95.85%  | 98.58% | 95.96%  |
|                                                            | 40 $\mu\text{L}/\text{min}$ | 92.17% | 94.62%  | 97.26% | 95.60%  | 98.36% | 97.40%  |
