# Supplementary material for: Isolation of acute myeloid leukemia blasts from blood using a microfluidic device
Source: Royal Society of Chemistry journal article supplement (doi:10.1039/d4an00158c), 2024-01-01
Supplement: d4an00158c12.pdf [file d4an00158c12.pdf]

| Sample      | Gene          | Variant allele frequency (VAF %) |          | c.DNA          | Protein                                    | Classification                | Observations                                 |
|-------------|---------------|----------------------------------|----------|----------------|--------------------------------------------|-------------------------------|----------------------------------------------|
|             |               | BM                               | PB       |                |                                            |                               |                                              |
| Patient 1   | <i>FLT3</i>   | >5                               | >5       | c.1773_1793dup | p.(Tyr597_Glu598ins AspValAspPheArgGluTyr) | TIER I                        | Prognostic and therapeutic indication in AML |
|             | <i>IDH2</i>   | >5                               | >5       | c.419G>A       | p.(Arg140Gln)                              | TIER I                        | Prognostic and therapeutic indication in AML |
|             | <i>NPM1</i>   | >5                               | >5       | c.860_863dup   | p.(Trp288Cysfs*12)                         | TIER I                        | Prognostic and therapeutic indication in AML |
|             | <i>ETV6</i>   | >5                               | >5       | c.602T>C       | p.(Leu201Pro)                              | TIER III                      | Not associated with AML                      |
|             | <i>SRSF2</i>  | >5                               | >5       | c.284C>G       | p.(Pro95Arg)                               | TIER I                        | Associated with AML                          |
|             | <i>SETBP1</i> | >5                               | >5       | c.691G>C       | p.(Val231Leu)                              | TIER IV                       | Without clinical significance                |
|             | <i>TET2</i>   | >5                               | >5       | c.5162T>G      | p.(Leu1721Trp)                             | TIER IV                       | Without clinical significance                |
|             | <i>ASXL1</i>  | >5                               | >5       | c.2444T>C      | p.(Leu815Pro)                              | TIER IV                       | Without clinical significance                |
|             | <i>KIT</i>    | >5                               | >5       | c.1621A>C      | p.(Met541Leu)                              | TIER III                      | Associated with AML                          |
| <i>TP53</i> | >5            | >5                               | c.215C>G | p.(Pro72Arg)   | TIER IV                                    | Without clinical significance |                                              |
| Patient 2   | <i>TP53</i>   | >5                               | >5       | c.375+5G>      | unknown                                    | TIER III                      | Not associated with AML                      |
|             | <i>TP53</i>   | >5                               | >5       | c.215C>G       | p.(Pro72Arg)                               | TIER IV                       | Without clinical significance                |
|             | <i>CSF3R</i>  | >5                               | >5       | c.1319G>A      | p.(Arg440Gln)                              | TIER IV                       | Without clinical significance                |
|             | <i>SETBP1</i> | >5                               | >5       | c.3388C>A      | p.(Pro1130Thr)                             | TIER III                      | Not associated with AML                      |
|             | <i>TET2</i>   | >5                               | >5       | c.1064G>A      | p.(Gly355Asp)                              | TIER IV                       | Without clinical significance                |
|             | <i>TET2</i>   | >5                               | >5       | c.5284A>G      | p.(Ile1762Val)                             | TIER IV                       | Without clinical significance                |
|             | <i>ASXL1</i>  | >5                               | >5       | c.5284A>G      | p.(Leu815Pro)                              | TIER IV                       | Without clinical significance                |
