# Supplementary figures and images for: Isolation of acute myeloid leukemia blasts from blood using a microfluidic device
Source: Royal Society of Chemistry journal article supplement (doi:10.1039/d4an00158c), 2024-01-01

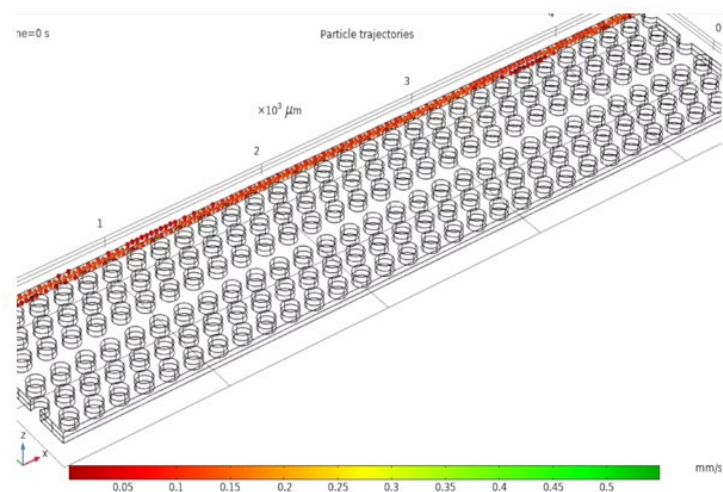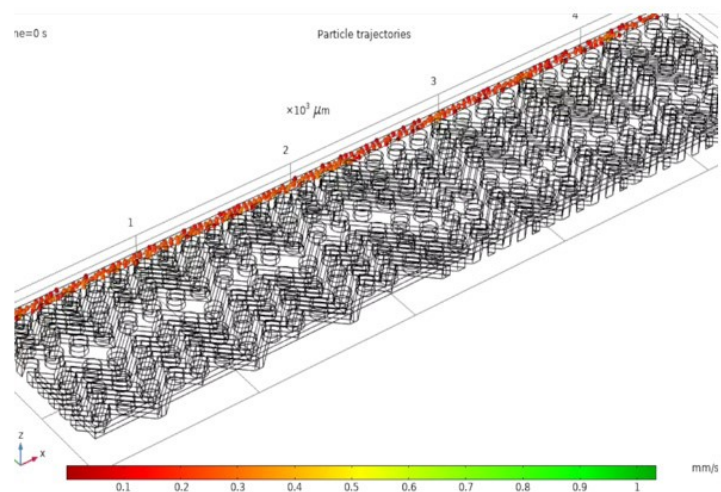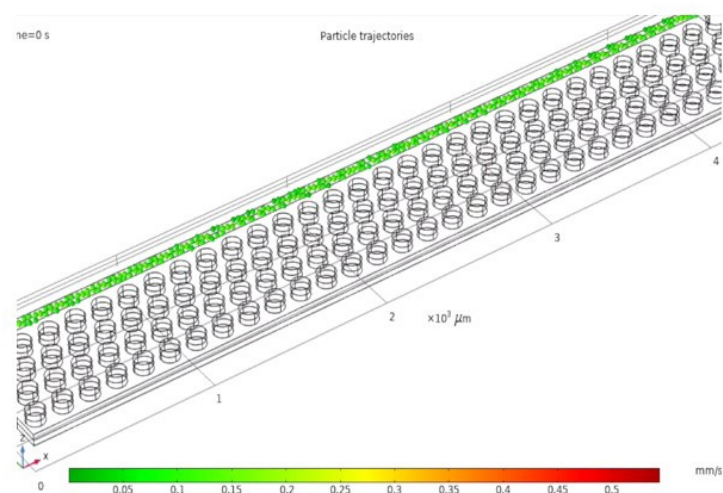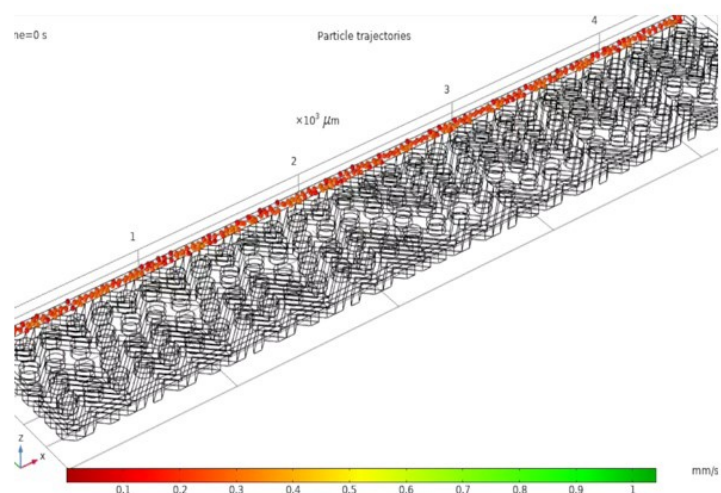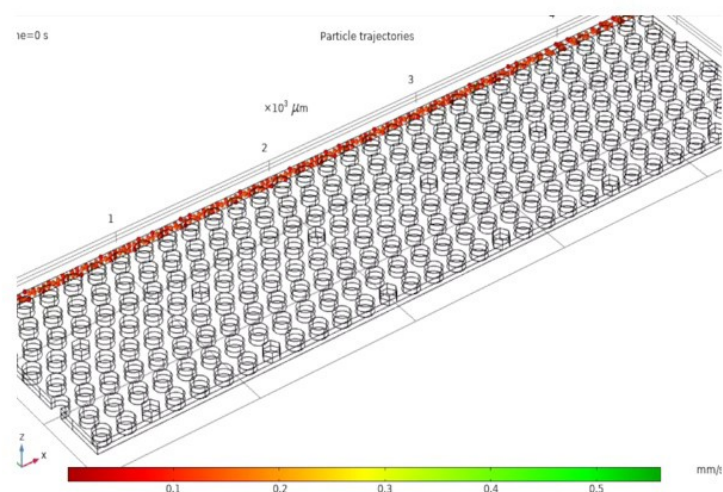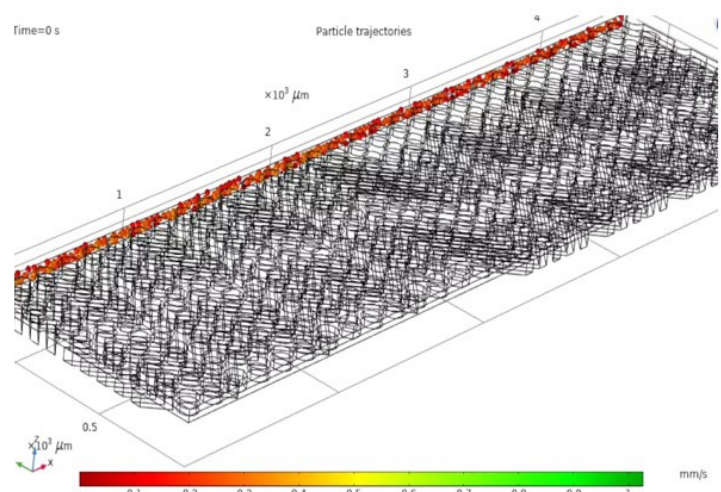

Supplement: d4an00158c4.pdf [file d4an00158c4.pdf]

A

i

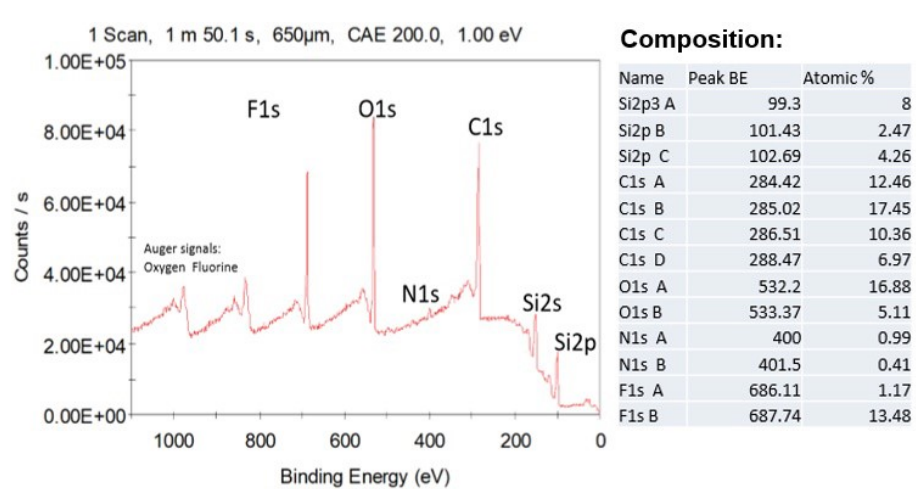

B

i

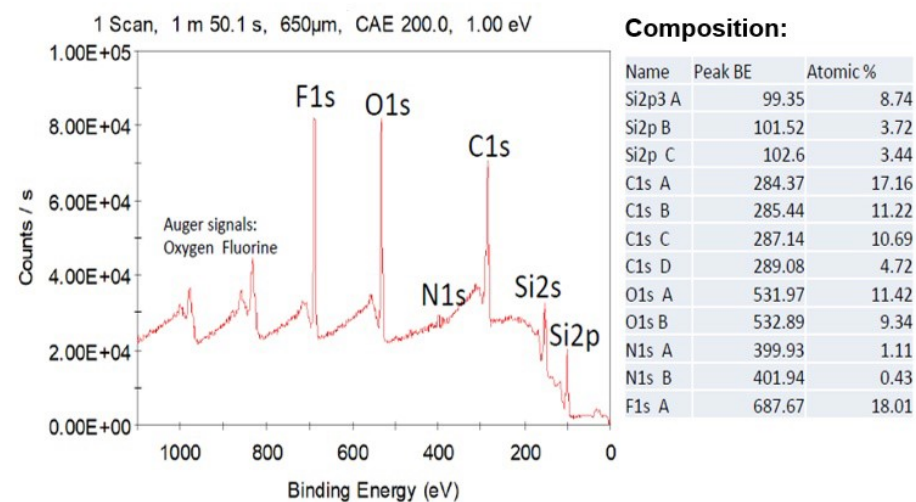

ii

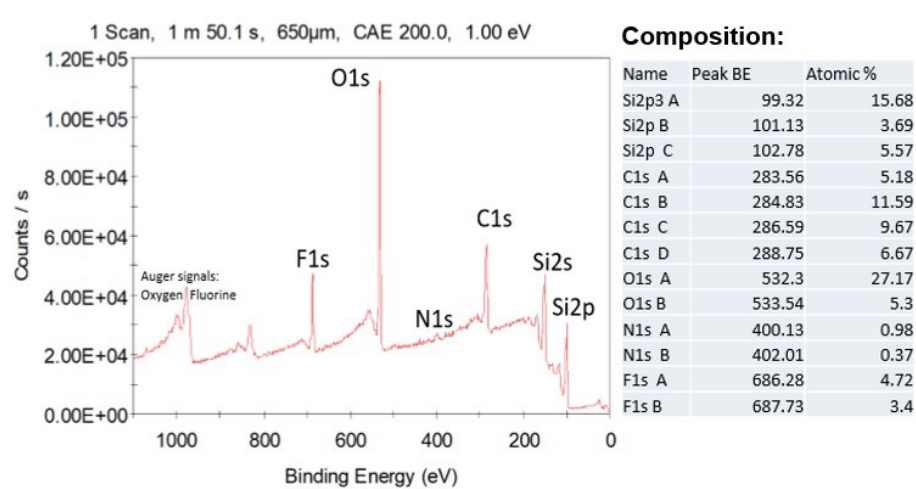

ii

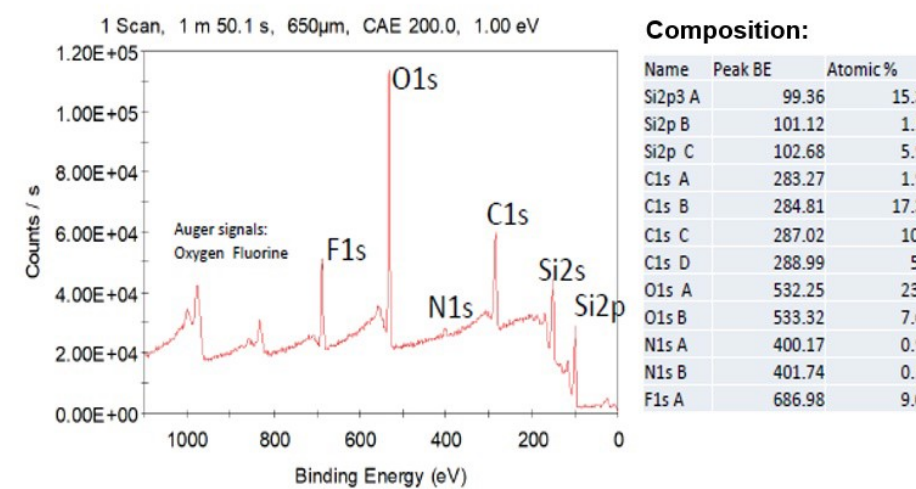

iii

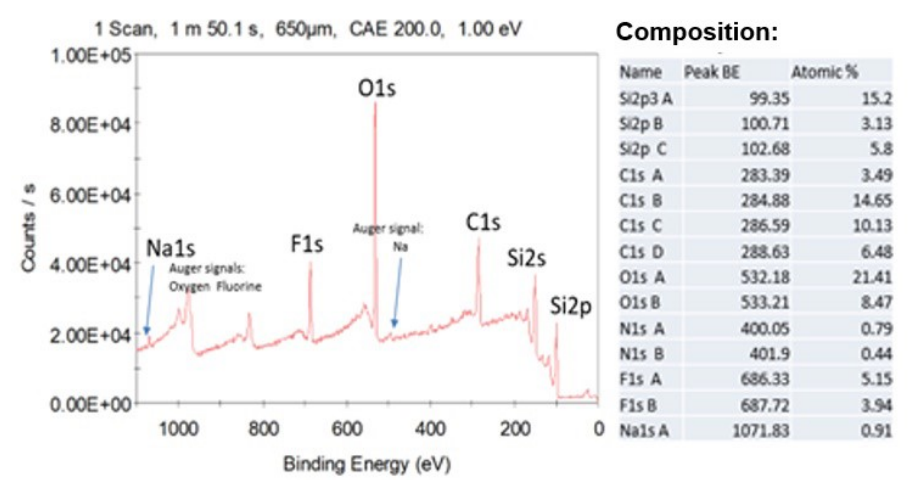

iii

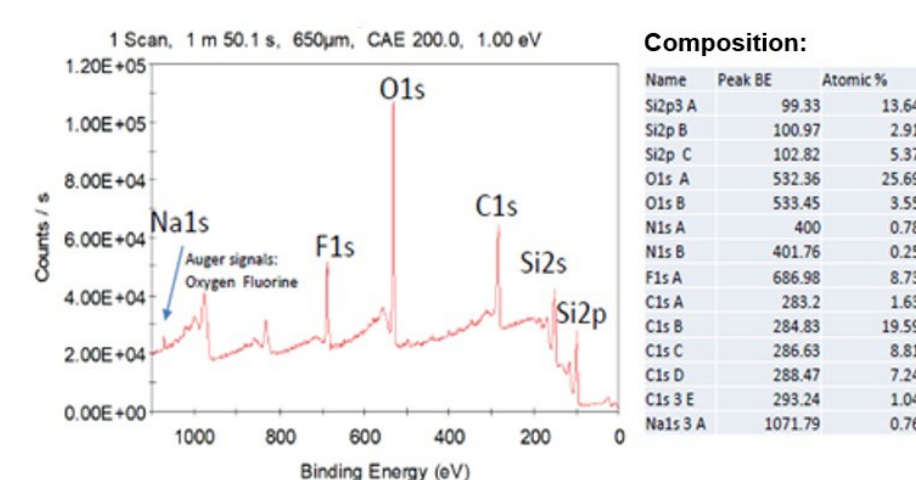

iv

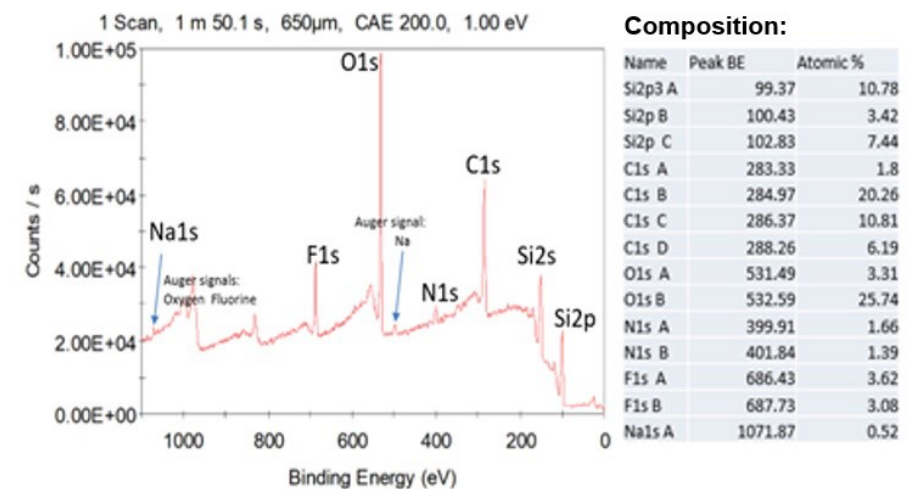

iv

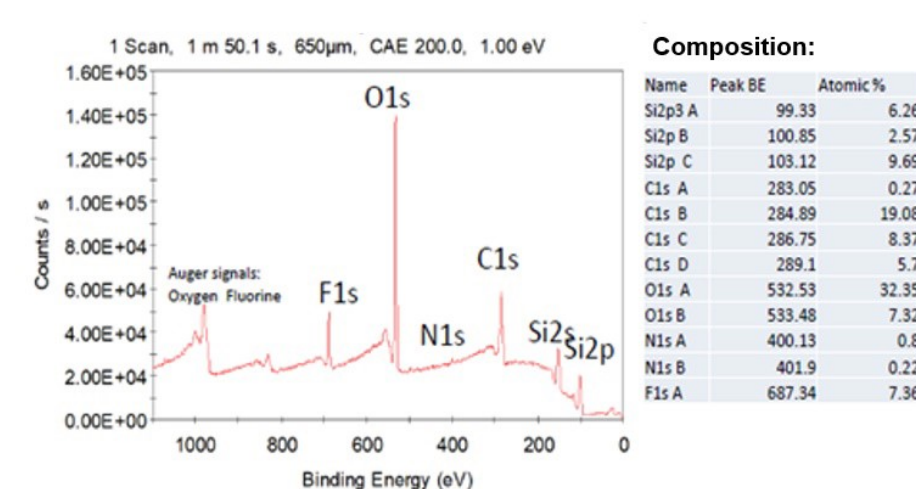

v

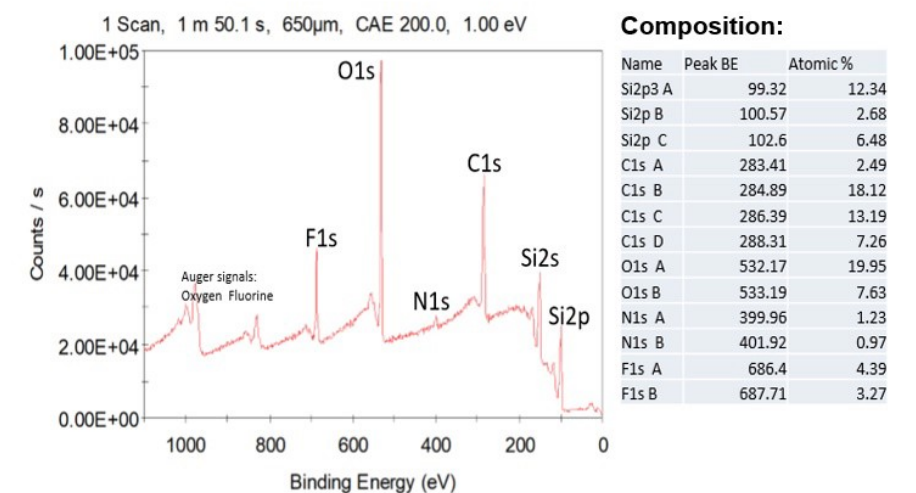

v

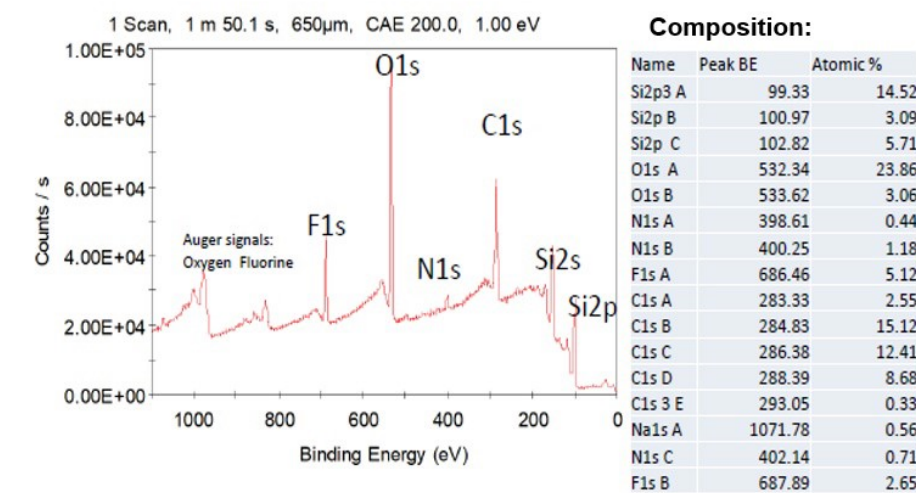

vi

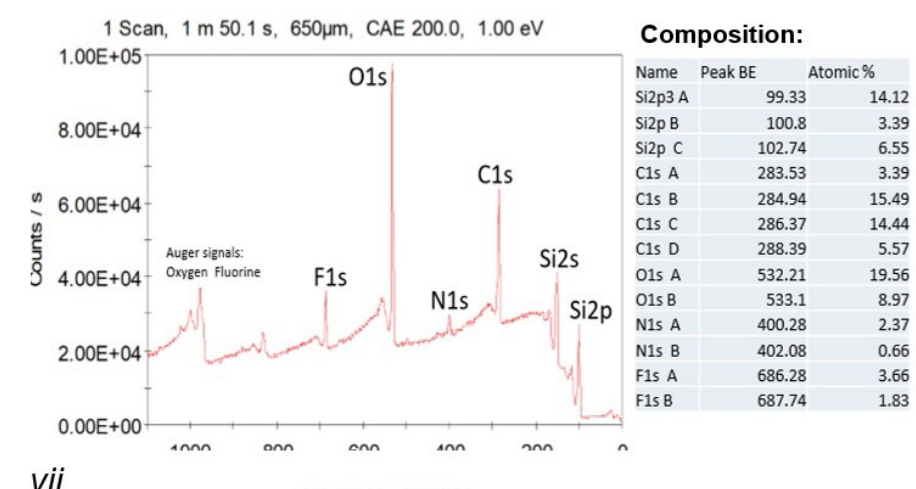

vi

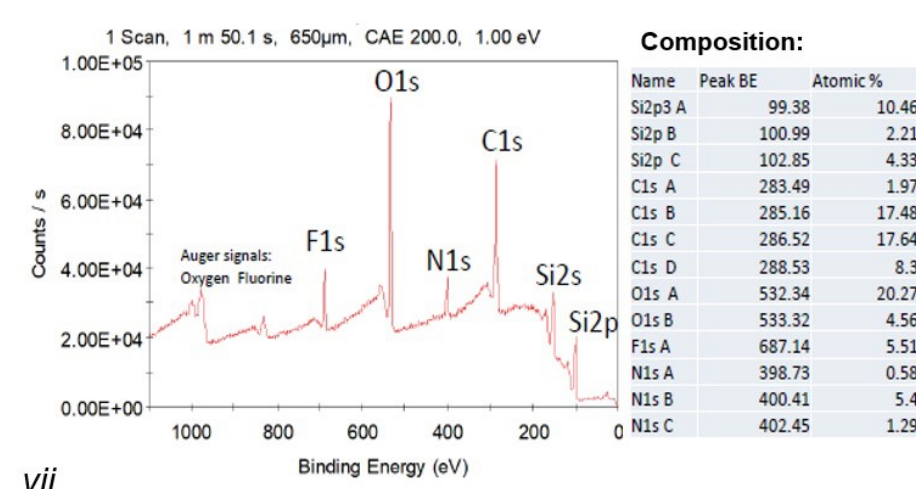

vii

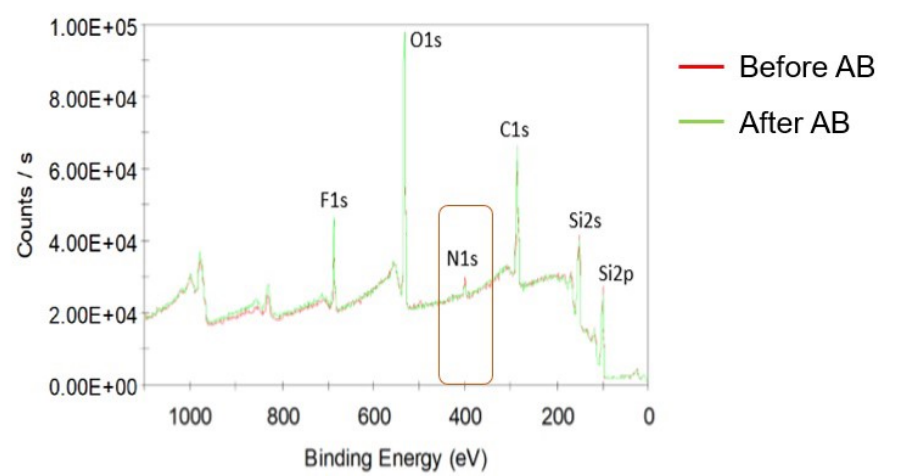

vii

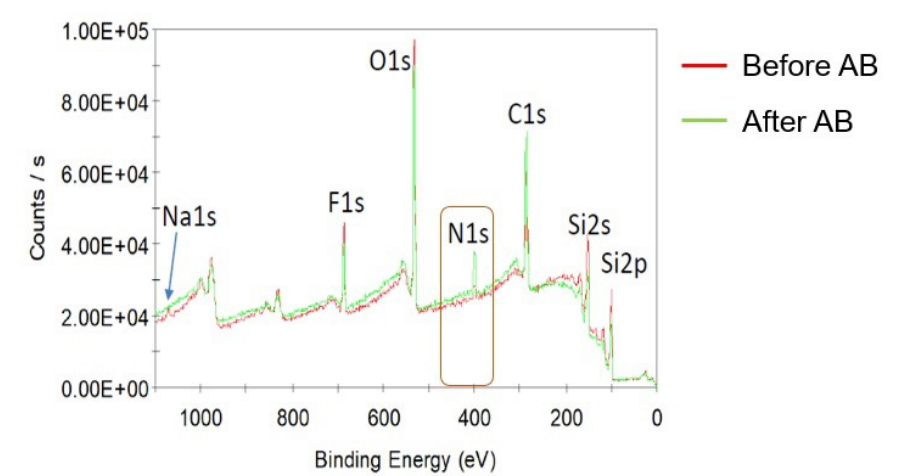

Supplement: d4an00158c5.pdf [file d4an00158c5.pdf]

1 min stamping

2 min stamping

Functionalised  
Glass slide  
+  
AB

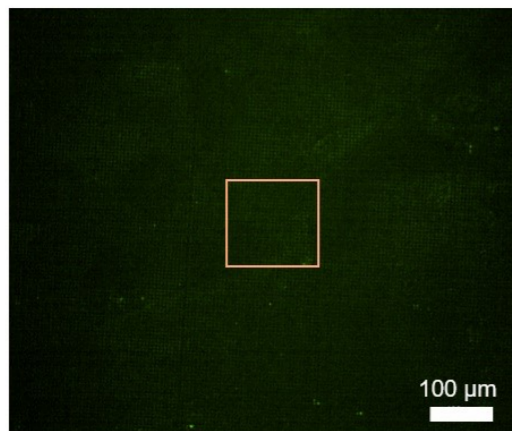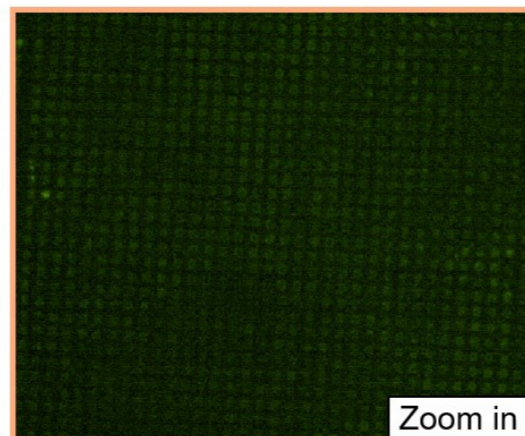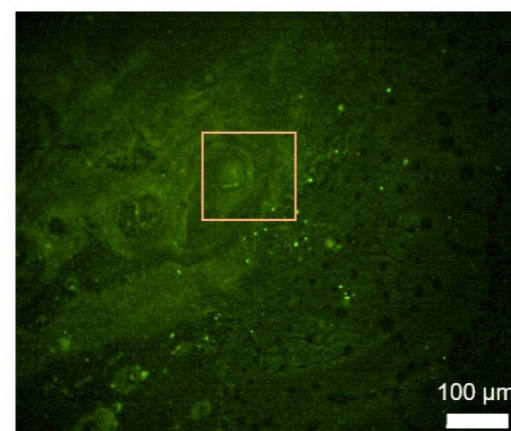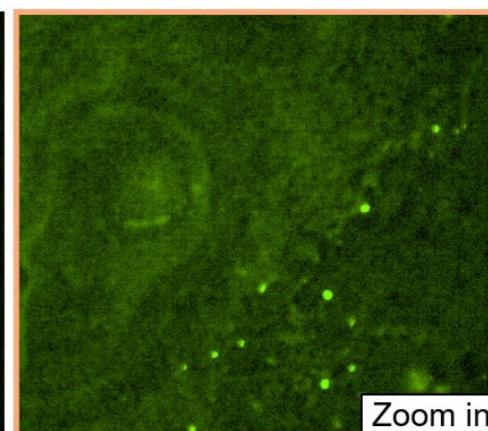

Bare  
Glass slide  
+  
AB

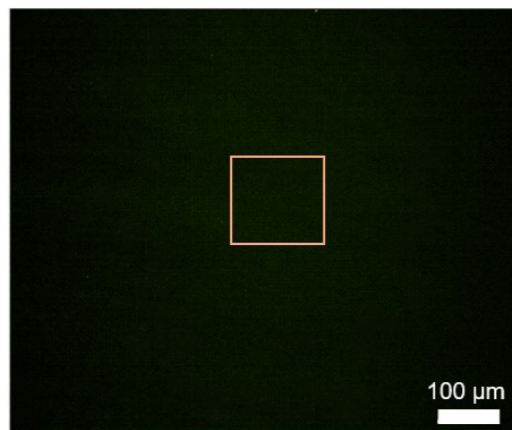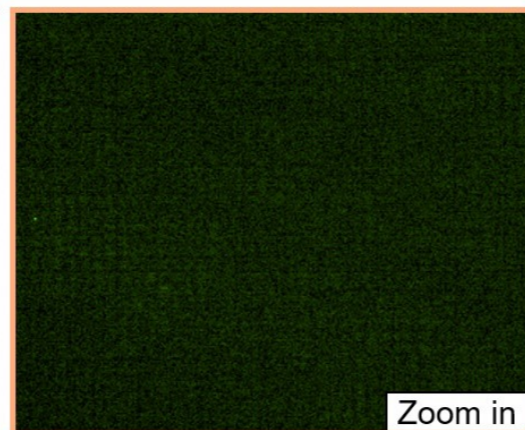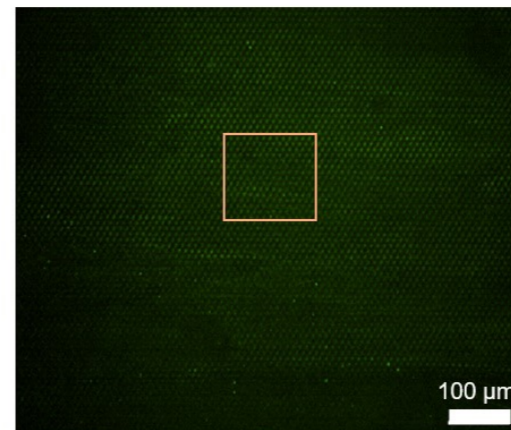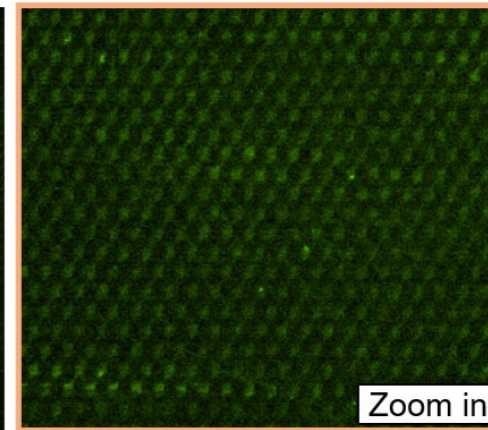

Supplement: d4an00158c6.pdf [file d4an00158c6.pdf]

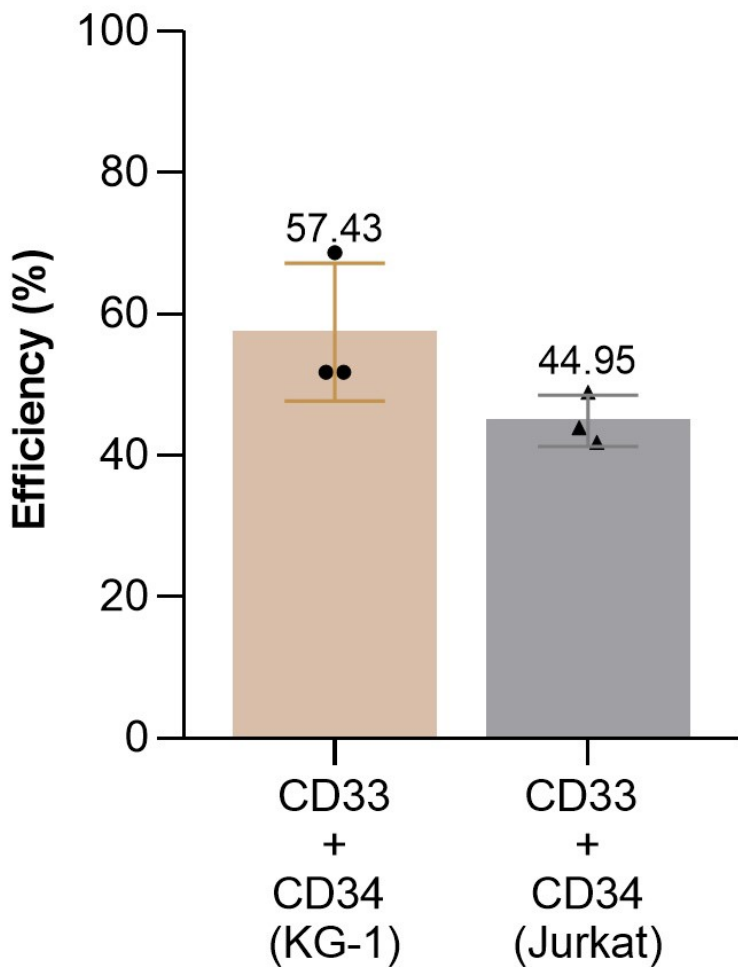

Supplement: d4an00158c7.pdf [file d4an00158c7.pdf]

**A**

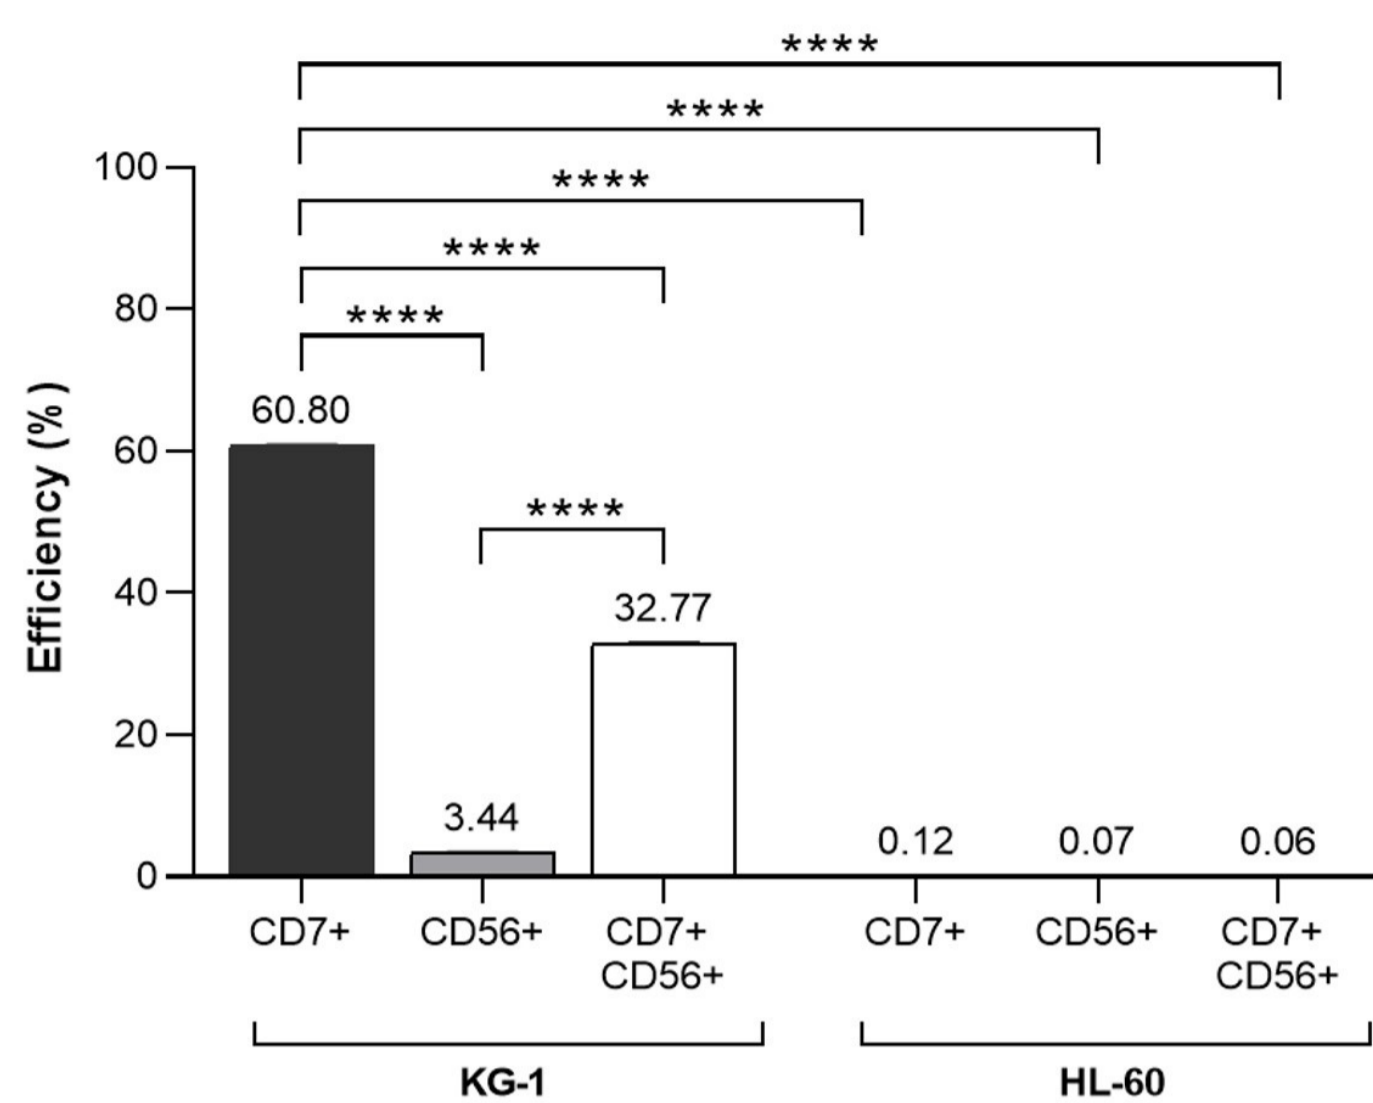

**B**

*i*

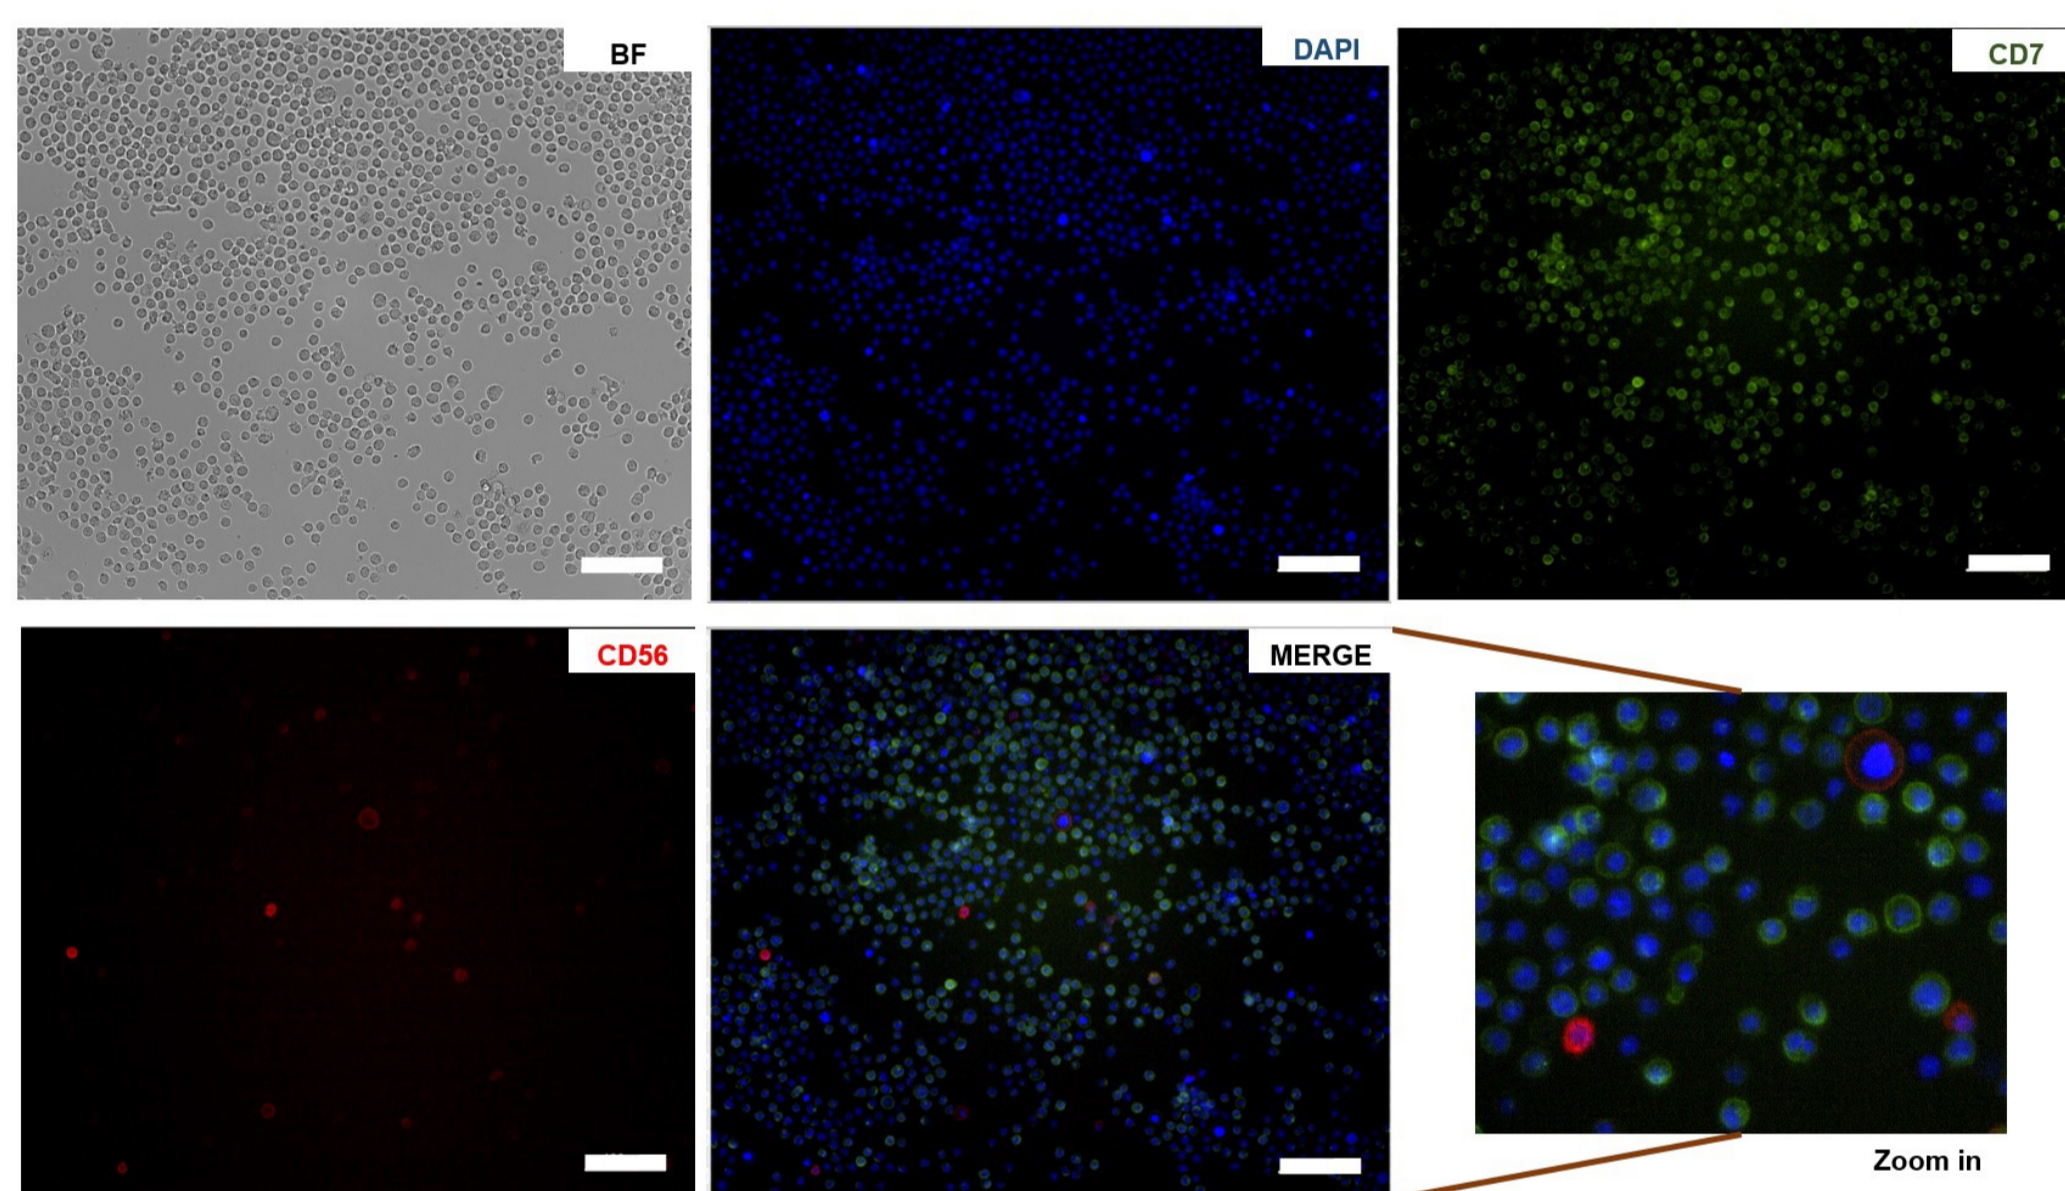

*ii*

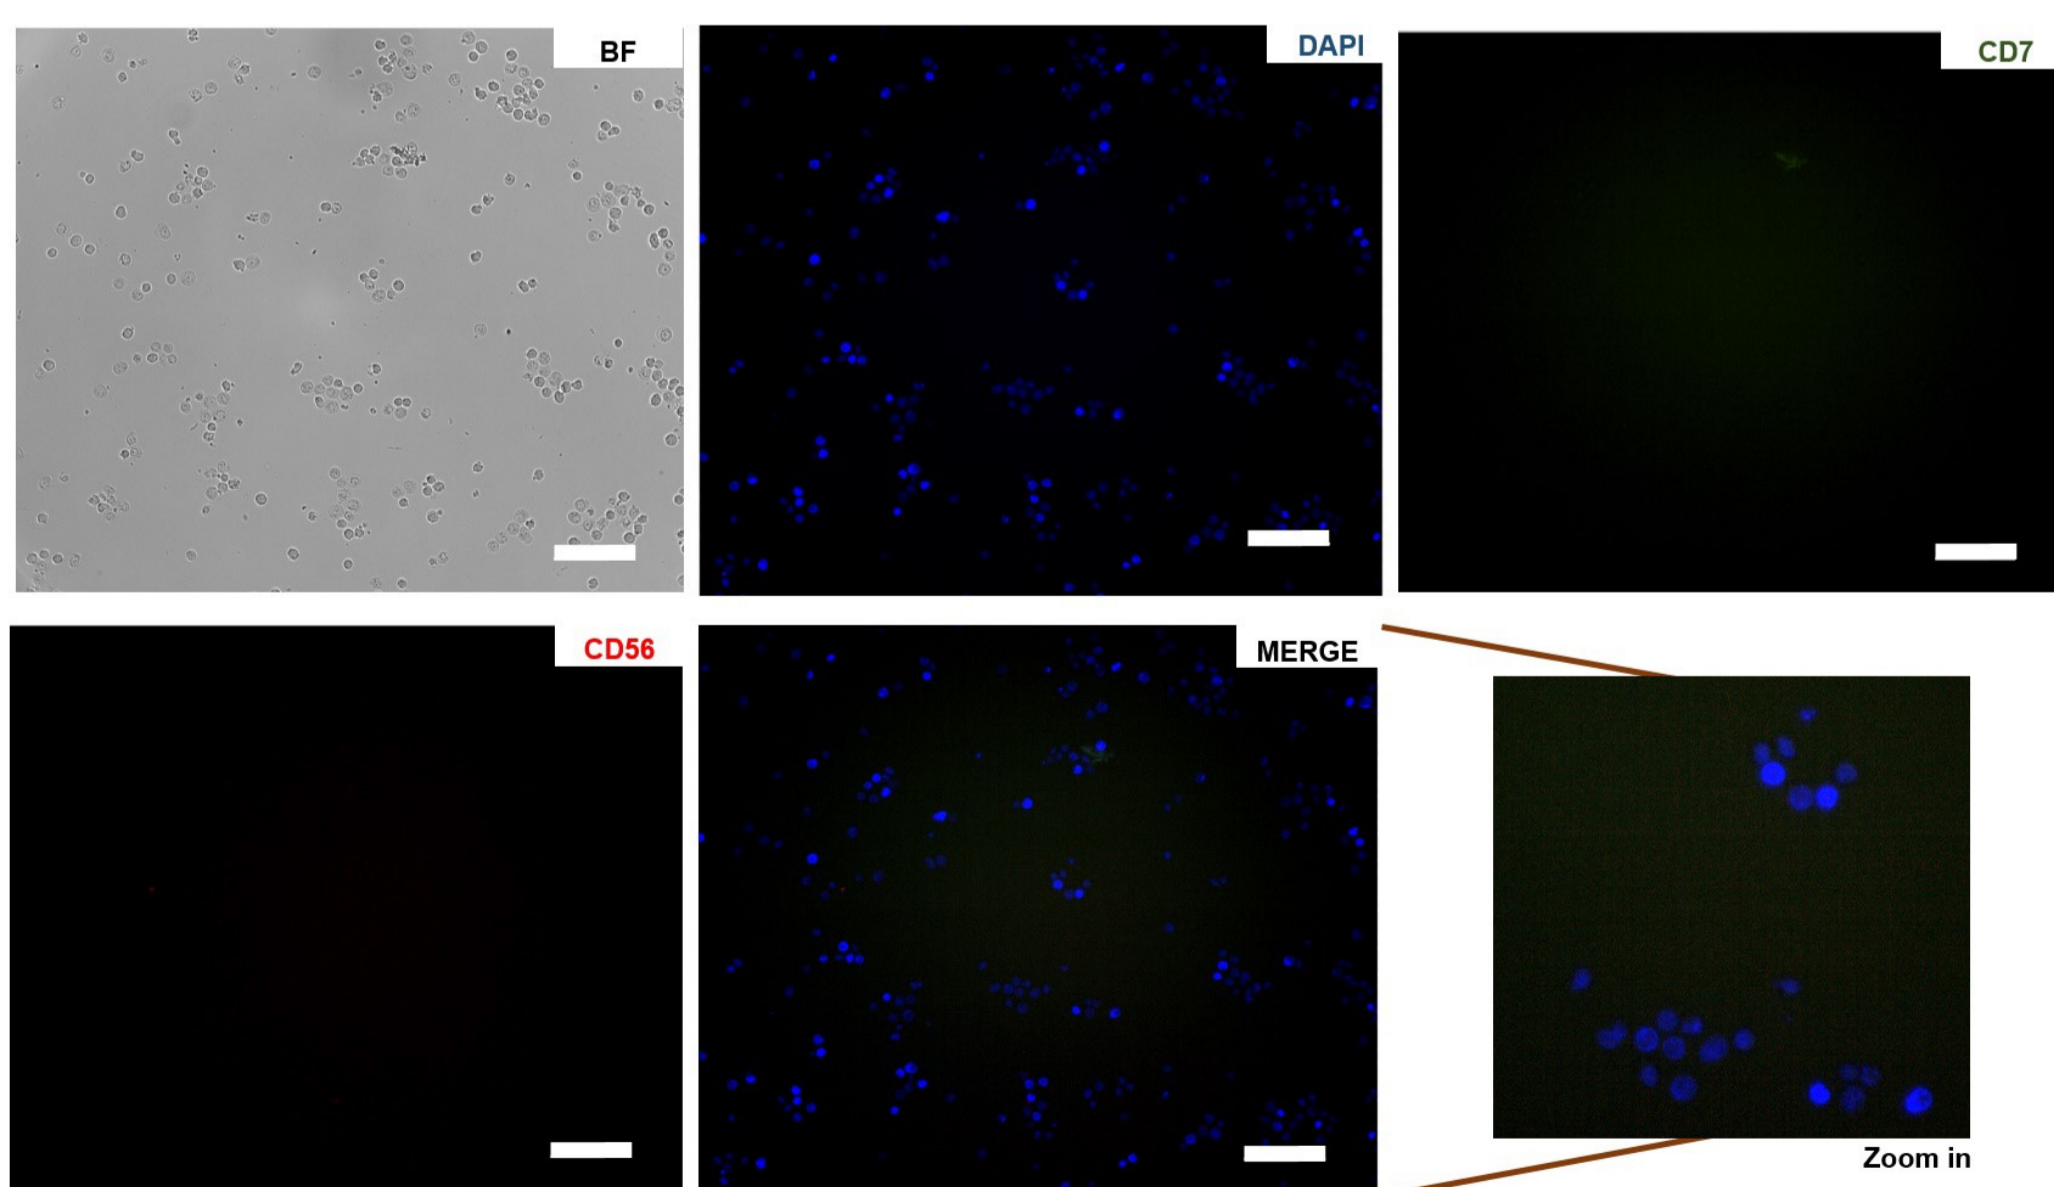

Supplement: d4an00158c8.pdf [file d4an00158c8.pdf]
